# Supplementary material
Source: publisher figshare collection journal article supplement (https://acs.figshare.com/ndownloader/files/3903184)
Supplement: Supplementary file 1 [file 3903184]

## Supporting Information

# Possible Oxygen Reduction Reactions for Graphene Edges from First Principles

Takashi Ikeda,<sup>\*,†</sup> Zhufeng Hou,<sup>‡</sup> Guoliang Chai,<sup>‡</sup> and Kiyoyuki Terakura<sup>‡,¶</sup>

*Condensed Matter Science Division, Quantum Beam Science Directorate, Japan Atomic Energy Agency (JAEA), Hyogo 679-5148, Japan, Department of Organic and Polymeric Materials, Graduate School of Science and Engineering, Tokyo Institute of Technology, 2-12-1 S5-20, Ookayama, Tokyo 152-8552, Japan, and Research Center for Simulation Science, Japan Advanced Institute of Science and Technology (JAIST), 1-1 Asahidai, Nomi, Ishikawa 923-1292, Japan*

E-mail: ikeda.takashi@jaea.go.jp

---

<sup>\*</sup>To whom correspondence should be addressed

<sup>†</sup>Japan Atomic Energy Agency (JAEA)

<sup>‡</sup>Tokyo Institute of Technology

<sup>¶</sup>Japan Advanced Institute of Science and Technology (JAIST)

Figure S1 shows the local density of states (LDOS) for the three kinds of binary-doped GNRs we considered. Compared to LDOS for  $N_{\text{edge}-1}$ -doped graphene shown in Figure 8 of ref 1, the density of  $\pi$  (i.e.,  $p_z$ ) states is significantly reduced (enhanced) just below (above) the Fermi level at C1 site in all the binary-doped GNRs, which is able to adsorb  $O_2$  molecules with the activation barrier of  $\sim 0.3$  eV.

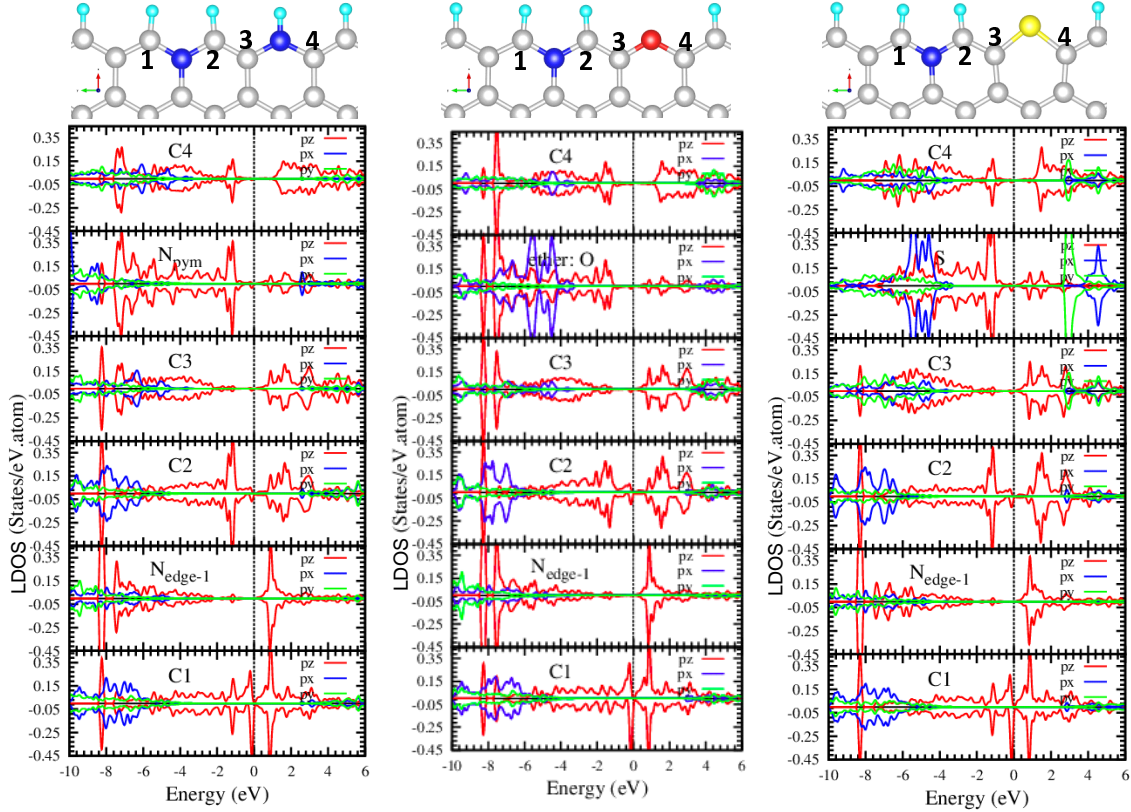

Figure S1: LDOS for  $p$  orbitals of dopants and their neighboring C atoms for GNR co-doped with pyridiniumlike N (left), pyranlike O (middle), and thiopyranlike S (right) along with  $N_{\text{edge}-1}$ . Atom colors are cyan for H, gray for C, red for O, blue for N, and yellow for S.

## References

- (1) Huang, S.-F.; Terakura, K.; Ozaki, T.; Ikeda, T.; Boero, M.; Oshima, M.; Ozaki, J.; Miyata, S. First-principles calculation of the electronic properties of graphene clusters doped with nitrogen and boron: Analysis of catalytic activity for the oxygen reduction reaction. *Phys. Rev. B* **2009**, *80*, 235410.
